1 A comparative genomics and immunoinformatics approach to identify epitope-based peptide  
2 vaccine candidates against bovine hemoplasmosis

3

4 Rosa Estela Quiroz-Castañeda<sup>1\*</sup>, Hugo Aguilar-Díaz<sup>2</sup>, Diana Laura Flores-García<sup>3</sup>, Fernando  
5 Martínez-Ocampo<sup>4</sup>, Itzel Amaro-Estrada

6

7 <sup>1</sup>Unidad de Anaplasmosis, Centro Nacional de Investigación Disciplinaria en Salud Animal e  
8 Inocuidad, INIFAP. Carretera Federal Cuernavaca-Cuautla No. 8534, Col. Progreso, 62550,  
9 Jiutepec, Morelos, México.

10

11 <sup>2</sup>Unidad de Artropodología, Centro Nacional de Investigación Disciplinaria en Salud Animal e  
12 Inocuidad, INIFAP. Carretera Federal Cuernavaca-Cuautla No. 8534, Col. Progreso, 62550,  
13 Jiutepec, Morelos, México.

14

15 <sup>3</sup>Universidad Politécnica del Estado de Morelos, Paseo Cuauhnahuac 566, Lomas del Texcal,  
16 C.P. 62574 Jiutepec, Morelos, México.

17

18 <sup>4</sup>Laboratorio de Estudios Ecogenómicos, Centro de Investigación en Biotecnología, Universidad  
19 Autónoma del Estado de Morelos, Av. Universidad No. 1001, Col. Chamilpa, 62209,  
20 Cuernavaca, Morelos, México.

21

22 \*Corresponding author

23 E-mail: requiroz79@yahoo.com.mx

## 24 **Abstract**

25 *Mycoplasma wenyonii* and ‘*Candidatus* *Mycoplasma haemobos*’ have been described as major  
26 hemoplasmas that infect cattle worldwide. Currently, three bovine hemoplasma genomes are  
27 known. The aim of this work was to know the main genomic characteristics and the evolutionary  
28 relationships between hemoplasmas, as well as to provide a list of epitopes identified by  
29 immunoinformatics that could be used as vaccine candidates against bovine hemoplasmosis. So  
30 far, there is not a vaccine to prevent this disease that impact economically in cattle production  
31 around the world.

32 In this work, we used comparative genomics to analyze the genomes of the hemoplasmas so far  
33 reported. As a result, we confirm that ‘*Ca. M haemobos*’ INIFAP01 is a divergent species from  
34 *M. wenyonii* INIFAP02 and *M. wenyonii* Massachusetts. Although both strains of *M. wenyonii*  
35 have genomes with similar characteristics (length, G+C content, tRNAs and position of rRNAs)  
36 they have different structures (alignment coverage and identity of 51.58 and 79.37%,  
37 respectively).

38 The correct genomic characterization of bovine hemoplasmas, never studied before, will allow to  
39 develop better molecular detection methods, to understand the possible pathogenic mechanisms  
40 of these bacteria and to identify epitopes sequences that could be used in the vaccine design.

## 41 **Introduction**

42 Hemotrophic mycoplasmas (hemoplasmas) are a group of erythrocytic pathogens of the  
43 *Mollicutes* class that infect a wide range of vertebrate animals [1,2]. At first, these small and  
44 uncultivable *in vitro* bacteria were classified as species of the genera *Haemobartonella* and  
45 *Eperythrozoon*, within the *Anaplasmataceae* family and *Rickettsiales* order [1]. However, the

46 genetic analysis of 16S ribosomal RNA (rRNA) gene and morphologic similarities showed that  
47 these bacteria are closely related to the *Mycoplasma* genus [2,3]. In 2001, the formal proposal  
48 was presented to transfer these organisms to genus *Mycoplasma*, within *Mycoplasmataceae*  
49 family [4]. Currently, 12 hemoplasma genomes have been identified in the GenBank database,  
50 including *Mycoplasma wenyonii* strains and *Candidatus Mycoplasma haemobos* [5–7]. These  
51 hemoplasma genomes have provided relevant information about possible pathogenic  
52 mechanisms, metabolism and divergences when compared to other *Mycoplasma* species [2].  
53 To date, *M. wenyonii* and *Ca. M. haemobos* have been described as major hemoplasmas that  
54 infect cattle worldwide [8–10]. In cattle, acute hemoplasma infections are rare but are  
55 characterized by anemia, fever, depression and diarrhea [11,12]. Chronic bovine hemoplasma  
56 infections have been associated with variable clinical signs, including low-grade bacteremia,  
57 weight loss, decreased milk production, reduced calf birth weight, pyrexia, scrotal and hind limb  
58 edema, infertility and reproductive inefficiency, and consequently, the bovine hemoplasmas have  
59 caused major economic losses worldwide, mainly when they associate with pathogens of genus  
60 *Anaplasma* or *Babesia* [13–15]. In addition, latent and asymptomatic infections have also been  
61 reported [14]. Single infections or coinfections between *M. wenyonii* and ‘*Ca. M. haemobos*’ are  
62 being reported [16–18]. However, reports of the genomic characterization of bovine  
63 hemoplasmas are scarce. So far, two genomes of this species were reported: *M. wenyonii*  
64 Massachusetts [5] and *M. wenyonii* INIFAP02 [7] and only one genome of this species was  
65 reported: ‘*Ca. M. haemobos*’ INIFAP01 [6]. On the other hand, computational *in silico* tools  
66 have been used to design vaccines by rational and cost effective manner, this strategy has several  
67 advantages, including prolonged immunity, elimination of unspecific responses and cost-and  
68 time-effectiveness [19,20]. In this sense, immunoinformatics is an effective tool that helps to

69 predict and to identify immunogenic sequences and the epitopes that could be recognized by  
70 antibodies that induce immune responses [21].  
71 In this work, we analyzed, for the first time, the genomic characteristics and the evolutionary  
72 relationships between bovine hemoplasmas. Also, we performed an immunoinformatic analysis to  
73 elucidate B-cell epitopes found in several proteins of *M. wenyonii* and *Ca. M. haemobos* that  
74 could be used as potential vaccine candidates to prevent bovine hemoplasmosis.

## 75 **Materials and methods**

### 76 **Genome sequences and annotation**

77 The 12 hemoplasma genomes that infect different hosts, included in this study and reported in  
78 the GenBank database (<https://bit.ly/314fOre>), are listed in Table S1. In Mexico, the  
79 Anaplasmosis Unit (CENID-SAI, INIFAP) has reported the draft genomes of two Mexican  
80 strains of hemoplasmas that infect cattle, '*Ca. Mycoplasma haemobos*' INIFAP01 [6] and *M.*  
81 *wenyonii* INIFAP02 [7]. The general features of 12 hemoplasma genomes were obtained using  
82 the QCAST (Quality Assessment Tool for Genome Assemblies) (v5.0.2) program [22] with  
83 default settings.

84 All genomes were annotated automatically to predict the coding sequences (CDS) using the  
85 RAST (Rapid Annotation using Subsystem Technology) (v2.0) server (<https://bit.ly/2XjTTey>)  
86 [23] with the Classic RAST algorithm.

87 The mapping of ribosomal genes (rRNA) was done based on the information reported in NCBI  
88 database of genomes of *M. wenyonii* Massachusetts, *M. wenyonii* INIFAP02 and *Ca. M.*  
89 *haemobos* INIFAP01 (NC\_018149.1; NZ\_QKVO000000000.1; and LWUJ000000000.1,  
90 respectively). Transfer (tRNA) RNA genes was carried out using ARAGORN (v1.2.38)

91 (<https://bit.ly/3k1R2QT>) server [24]. The sequence and length of 16S and 23S rRNA genes was  
92 obtained from the RNAmmer (v1.2) (<https://bit.ly/3glQKCj>) server [25].

### 93 **Phylogenetic and pan-genomic analysis**

94 For the phylogenetic reconstruction, the 16S rRNA gene sequences of 15 bovine hemoplasmas  
95 were aligned with 22 downloaded rRNA gene sequences of other hemoplasma species and two  
96 downloaded rRNA gene sequences of the genus *Ureaplasma*, which were obtained from the  
97 GenBank database (<https://bit.ly/314fOre>) using the nucleotide BLAST (Blastn) suite  
98 (<https://bit.ly/3k2Wkvs>) [26]. Multiple alignments between 39 16S rRNA gene sequences were  
99 made using the MUSCLE (v3.8.31) program [27]. The jModelTest (v2.1.10) program [28] was  
100 used to select the best model of nucleotide substitution with the Akaike information criterion.  
101 The phylogenetic tree was estimated under the Maximum-Likelihood method using the PhyML  
102 (v3.1) program [29] with 1,000 bootstrap replicates. The phylogenetic tree was visualized and  
103 edited using the FigTree (v1.4.4) program (<https://bit.ly/39ROMXV>).  
104 Two pan-genomic analyzes were performed using the GET\_HOMOLOGUES (v3.3.2) software  
105 package [30] with the following options: i) among the 12 hemoplasma genomes; and ii) among  
106 the three genomes of bovine hemoplasmas. Briefly, the FAA (Fasta Amino Acid) annotation  
107 files of hemoplasma genomes were used as input files by the GET\_HOMOLOGUES software  
108 package. The get\_homologues.pl and compare\_clusters.pl Perl scripts were used to compute a  
109 consensus pan-genome, which resulting from the clustering of the all-against-all protein BLAST  
110 (Blastp) results with the COGtriangles and OMCL algorithms. The pan-genomic analysis was  
111 performed using the binary (presence-absence) matrix.

### 112 **Comparative genomics**

113 The average nucleotide identity (ANI) values of 12 hemoplasma genomes were calculated using  
114 the `calculate_ani.py` Python script (<https://bit.ly/2X96hho>) with the BLAST-based ANI (ANIb)  
115 algorithm. Ultimately, the level of conserved genomic sequences of bovine hemoplasmas was  
116 visualized by alignment the genomes of Mexican strains ('*Ca. M. haemobos*' INIFAP01 and *M.*  
117 *wenyonii* INIFAP02) against the reference genome of *M. wenyonii* Massachusetts, using the  
118 NUCmer program of MUMmer (v3.0) software package (Kurtz et al., 2004) to get the positions  
119 of nucleotides that were aligned; and Circos (v0.69-9) software package [32]. The circular  
120 comparative genomic map of bovine hemoplasmas was edited with Adobe Photoshop CC (v14.0  
121 x64) program.

## 122 **Prediction of antigenic proteins**

123 After RAST annotation, we identified several proteins of the subsystems, including virulence,  
124 disease and defense, cell division and cell cycle, fatty acids, lipids and isoprenoids, regulation  
125 and cellular signaling, stress response, and DNA metabolism. To predict antigenicity, the  
126 sequence of 11 proteins of *M. wenyonii* and 12 proteins of *Ca. M. haemobos* were submitted to  
127 VaxiJen v2.0 server (<http://www.ddgpharmfac.net/vaxijen/VaxiJen/VaxiJen.html>) with default  
128 parameters.

## 129 **Prediction of subcellular localization and stability of the proteins**

130 Predicted antigenic proteins of *M. wenyonii* and *Ca. M. haemobos* were submitted to the  
131 prediction of secondary structure server Raptor X (<http://raptorx.uchicago.edu/>).

## 132 **Linear B-cell epitope prediction and three-dimensional modelling**

133 B-Cell epitopes were predicted using BCEpred (<http://crdd.osdd.net/raghava/bcepred/>), and  
134 Predicting Antigenic Peptides tool (<http://imed.med.ucm.es/Tools/antigenic.pl>).

135 The PHYRE2 server was used to predict the tridimensional structure of the proteins of both  
136 hemoplasmas. Phyre2 PDB files were visualized with Protter tool.

## 137 Results

### 138 General features of genomes

139 The major genomic features of hemoplasmas are shown in Table 1.

140 **Table 1. General features of 12 hemoplasma genomes.**

| Organism                                    | Assembly level | Length (bp)* | G+C content (%)* | CDS ** | rRNAs# | tRNAs# |
|---------------------------------------------|----------------|--------------|------------------|--------|--------|--------|
| ' <i>Ca. M. haemobos</i> ' INIFAP01         | 18 contigs     | 935,638      | 30.46            | 1,180  | 3      | 31     |
| <i>M. haemocanis</i> Illinois               | Chromosome     | 919,992      | 35.33            | 1,234  | 3      | 31     |
| <i>M. haemofelis</i> Langford 1             | Chromosome     | 1,147,259    | 38.85            | 1,595  | 3      | 31     |
| <i>M. haemofelis</i> Ohio2                  | Chromosome     | 1,155,937    | 38.81            | 1,650  | 3      | 31     |
| ' <i>Ca. M. haemolamae</i> ' Purdue         | Chromosome     | 756,845      | 39.27            | 1,045  | 3      | 33     |
| ' <i>Ca. M. haemominutum</i> ' Birmingham 1 | Chromosome     | 513,880      | 35.52            | 587    | 3      | 32     |
| <i>M. ovis</i> Michigan                     | Chromosome     | 702,511      | 31.69            | 918    | 4      | 32     |
| <i>M. parvum</i> Indiana                    | Chromosome     | 564,395      | 26.98            | 578    | 3      | 32     |
| <i>M. suis</i> Illinois                     | Chromosome     | 742,431      | 31.08            | 914    | 3      | 32     |
| <i>M. suis</i> KI3806                       | Chromosome     | 709,270      | 31.08            | 856    | 3      | 32     |
| <i>M. wenyonii</i> INIFAP02                 | 37 contigs     | 596,665      | 33.43            | 678    | 3      | 32     |
| <i>M. wenyonii</i> Massachusetts            | Chromosome     | 650,228      | 33.92            | 727    | 3      | 32     |

141 CDS: coding sequences; \*data obtained with the QUAST program; \*\*data obtained with the  
142 RAST server; #data obtained with the RNAmmer server; and ##data obtained with the  
143 ARAGORN server.

144

145 Of the 12 hemoplasma genomes, ten genomes are assembled in a single chromosome and two  
146 draft genomes are assembled in contigs. The genomic features of hemoplasmas allow them to be  
147 separated into two groups: the group 1 (previously named *Haemobartonella*) consists of four  
148 genomes of '*Ca. M. haemobos*', *M. haemocanis* and *M. haemofelis* species, that have a length

149 from 0.9 to 1.1 Mb, a number of CDS from 1,180 to 1,650, and specifically 31 tRNA genes; and  
150 the group 2 (previously named *Eperythrozoon*) consists of eight genomes of ‘*Ca. M.*  
151 *haemolamae*’, ‘*Ca. M. haemominutum*’, *M. ovis*, *M. parvum*, *M. suis* and *M. wenyonii* species,  
152 that have a length from 0.5 to 0.7 Mb, a number of CDS from 578 to 1,045; and 32 or 33 tRNA  
153 genes.

154 The mapping of rRNA genes shows that hemoplasmas are also separated into two groups. The  
155 four genomes of group 1 contain one copy of 16S-23S-5S rRNA operon (Fig 1A). The 16S  
156 rRNA gene sequences of group 1 have a length from 1,459 to 1,460 bp. Conversely, seven  
157 genomes of group 2 contain one copy of 16S rRNA gene with a length from 1,479 to 1,499 pb,  
158 which is separated from one copy of 23S-5S rRNA operon (Fig 1B and 1C). Also, the genome of  
159 *M. ovis* Michigan of group 2 contains two copies of 16S rRNA gene with lengths of 1,467 and  
160 3,219 bp, which are separated from each other, and they are separated from the one copy of 23S-  
161 5S rRNA operon (Fig 1D).

162 **Fig 1. Mapping of rRNA genes of hemoplasmas.** A) Genomes of ‘*Ca. M. haemobos*’  
163 INIFAP01, *M. haemocanis* Illinois, *M. haemofelis* Langford 1 and *M. haemofelis* Ohio2 of group  
164 1 contain one copy of 16S-23S-5S rRNA operon. B) Genomes of ‘*Ca. M. haemolamae*’ Purdue,  
165 ‘*Ca. M. haemominutum*’ Birmingham 1, *M. suis* Illinois, *M. suis* KI3806, *M. wenyonii*  
166 INIFAP02 and *M. wenyonii* Massachusetts of group 2 contain one copy of 16S rRNA gene  
167 which is separate from one copy of 23S-5S rRNA operon in different chain. C) Genome of *M.*  
168 *parvum* Indiana of group 2 contains one copy of 16S rRNA gene which is separate from one  
169 copy of 23S-5S rRNA operon in the same chain. D) Genome of *M. ovis* Michigan of group 2  
170 contains two copies of 16S rRNA gene which are separated from each other, and they are



171 separated from the one copy of 23S-5S rRNA operon in the same chain. The 16S, 23S and 5S  
172 rRNA genes are represented by blue, green and red arrows, respectively.  
173  
174 The 16S rRNA gene sequence of ‘*Ca. M. haemobos*’ INIFAP01 has alignment coverage of 82-  
175 98% and identity of 98.71-99.93% with ‘*Ca. M. haemobos*’, ‘*Ca. M. haemobos*’ clone 307, ‘*Ca.*  
176 *M. haemobos*’ clone 311 and ‘*Ca. M. haemobos*’ isolate cattle no. 18. Additionally, 16S rRNA  
177 gene sequence of ‘*Ca. M. haemobos*’ INIFAP01 has alignment coverage of 99% and identity of  
178 81.83 and 81.73% with *M. wenyonii* INIFAP02 and *M. wenyonii* Massachusetts, respectively.  
179 On the other hand, the genomes of *M. wenyonii* INIFAP02 and *M. wenyonii* Massachusetts are  
180 very similar in length and G+C content to each other, and they have the same number of tRNA  
181 genes and distribution of rRNA genes. However, the 16S rRNA gene sequence of *M. wenyonii*  
182 INIFAP02 has alignment coverage of 100% and identity of 97.57% with *M. wenyonii*  
183 Massachusetts. Additionally, 16S rRNA gene sequence of *M. wenyonii* INIFAP02 has: i)  
184 alignment coverage of 91-98% and identity of 99.24-99.93% with *M. wenyonii* isolate Fengdu,  
185 *M. wenyonii* clone 1, *M. wenyonii* isolate ada1 and *M. wenyonii* isolate C124; and ii) alignment  
186 coverage of 90-98% and identity of 97.50-97.87% with *M. wenyonii* strain CGXD, *M. wenyonii*  
187 isolate B003, *M. wenyonii* isolate C031 and *M. wenyonii* strain Langford.

## 188 **Phylogenetic and pan-genomic analyzes**

189 The model of nucleotide substitution of the phylogenetic tree that is based on 16S rRNA gene of  
190 hemoplasmas was GTR+I+G. The phylogenetic tree shows that groups 1 and 2 of hemoplasma  
191 species are separated into different clades (Fig 2). The clade 1 (blue lines) contains two sub-  
192 clades: i) ‘*Ca. M. haemobos*’ species; and ii) *M. haemocanis* and *M. haemofelis* species. The  
193 clade 2 (red lines) also contains two subclades: i) ‘*Ca. M. haemolamae*’, ‘*Ca. M.*

194 haemominutum', *M. ovis* and *M. wenyonii* species; and ii) *M. parvum* and *M. suis* species. The  
195 phylogenetic tree topology shows a divergence between two groups of hemoplasmas.

196

197 **Fig 2. Phylogenetic relationships based on the 16S rRNA genes of group 1 (blue lines) and 2**

198 **(red lines) of hemoplasma species.** The phylogenetic tree was obtained using the PhyML

199 program with the Maximum-Likelihood method and 1,000 bootstrap replicates. Bootstrap values

200 (>50%) are displayed in the nodes. The model of nucleotide substitution was GTR+I+G. The

201 INIFAP01 and INIFAP02 Mexican strains of bovine hemoplasmas are shown in blue and red

202 letters, respectively. GenBank accession numbers are shown in square brackets.

203

204 Pan-genomic analysis among the 12 hemoplasmas shows that the core, soft core, shell and cloud

205 genomes are composed of 110, 146, 787 and 3,099 gene clusters, respectively (Figs S1 and S2).

206 Additionally, the core genomes of groups 1 and 2 of hemoplasmas are composed of 236 and 149

207 gene clusters, respectively.

208 Pan-genomic analysis among the three genomes of bovine hemoplasmas shows that the core

209 genome is composed of 154 gene clusters. Also, the two genomes of *M. wenyonii* species share

210 273 gene clusters. Moreover, 'Ca. *M. haemobos*' INIFAP01, *M. wenyonii* INIFAP02 and *M.*

211 *wenyonii* Massachusetts contain 312, 190 and 157 unique gene clusters, respectively.

212 **Comparative genomics**

213 ANIb values between different hemoplasma species show that alignment coverage is less than

214 79% (Fig 3A and Table S2); and identity is less than 83% (Fig 3B and Table S3).

215 **Fig 3. Heatmaps of BLAST-based average nucleotide identity (ANIb) values of 12**

216 **hemoplasma genomes.** A) Heatmap of ANIb values of alignment coverage. B) Heatmap of

217 ANIb values of identity. Color intensity increases from white to deep blue when ANIb values  
218 approach from 0.0 to 1.0 (0 - 100%), respectively.

219

220 Also, ANIb values show that '*Ca. M. haemobos*' INIFAP01 has an alignment coverage of 0.46  
221 and 0.31%; and identity of 74.12 and 74.16% with *M. wenyonii* INIFAP02 and *M. wenyonii*  
222 Massachusetts, respectively. Moreover, ANI values between the same species show that: i) *M.*  
223 *haemofelis* genomes have an alignment coverage and identity of 97.65 and 97.41%, respectively;  
224 ii) *M. suis* genomes have an alignment coverage and identity of 95.13 and 97.63%, respectively;  
225 and iii) *M. wenyonii* genomes have an alignment coverage and identity of 51.58 and 79.37%,  
226 respectively.

227 The circular map (Fig 4) shows that '*Ca. M. haemobos*' INIFAP01 genome only has three small  
228 regions (red lines highlighted with green marker in inner track) greater than 78% identity that  
229 were aligned with *M. wenyonii* Massachusetts genome (black circle in outer track). Also, the  
230 circular map shows that *M. wenyonii* INIFAP02 has few regions (blue lines in intermediate  
231 track) greater than 78% identity that were aligned with *M. wenyonii* Massachusetts genome.

232 **Fig 4. Circular map of *M. wenyonii* Massachusetts and '*Ca. M. haemobos*' INIFAP01**  
233 **genomes.**

234

### 235 **Selection and prediction of B-cell epitopes in proteins**

236 The sequences of 11 proteins of *M. wenyonii* and 12 proteins of *Ca. M. haemobos* were  
237 submitted to VaxiJen. The prediction of Antigen/Non Antigen for each selected protein is shown  
238 in Table 2.

239 **Table 2. Prediction of antigenicity of proteins of *Ca. M. haemobos* and *M. wenyonii*.**

*Candidatus* Mycoplasma haemobos INIFAP01

| <b>Classification</b> | <b>Prediction score as antigen (Vaxijen)</b> |
|-----------------------|----------------------------------------------|
|-----------------------|----------------------------------------------|

RAST Category: Virulence, disease, and defense

|                                                    |                  |
|----------------------------------------------------|------------------|
| DNA gyrase subunit B                               | 0.5352 (Antigen) |
| DNA gyrase subunit A                               | 0.4373 (Antigen) |
| SSU ribosomal protein S7p                          | 0.518 (Antigen)  |
| Translation Elongation factor G                    | 0.5399 (Antigen) |
| Translation Elongation factor Thermo unstable (Tu) | 0.4268 (Antigen) |
| SSU ribosomal protein S12p                         | 0.7537 (Antigen) |
| DNA-directed RNA polymerase beta subunit           | 0.3781 (Antigen) |
| DNA-directed RNA polymerase                        | 0.4488 (Antigen) |

RAST Category: Division and Cell Cycle

|                                  |                      |
|----------------------------------|----------------------|
| ProteinTsaD/Kae1/Qri7            | 0.3846 (Non Antigen) |
| RNA polymerase sigma factor RpoD | 0.3857 (Non Antigen) |
| DNA primase                      | 0.3009 (Non Antigen) |

RAST Category: Fatty acids, Lipids and Isoprenoids

|                      |                      |
|----------------------|----------------------|
| Cardiolipin synthase | 0.3463 (Non Antigen) |
|----------------------|----------------------|

RAST Category: Stress Response

|                                |                      |
|--------------------------------|----------------------|
| Manganase superoxide dismutase | 0.3487 (Non Antigen) |
|--------------------------------|----------------------|

*Mycoplasma wenyonii* INIFAP02

RAST Category: Virulence, disease, and defense

|                                                    |                  |
|----------------------------------------------------|------------------|
| Ribosomal protein SSU S7p                          | 0.5435 (Antigen) |
| Translation Elongation factor G                    | 0.5650 (Antigen) |
| Translation Elongation factor Thermo unstable (Tu) | 0.4359 (Antigen) |
| Ribosomal protein SSU S12p                         | 0.7774 (Antigen) |
| Ribosomal protein LSU L35p                         | 0.5491 (Antigen) |

|     |                                 |                  |
|-----|---------------------------------|------------------|
| 240 | Translation Initiation factor 3 | 0.4488 (Antigen) |
| 241 | Ribosomal protein LSU L20p      | 0.3668 (Antigen) |

242 RAST Category: Division and Cell Cycle

|     |                                  |                      |
|-----|----------------------------------|----------------------|
| 243 | Protein TsaD/Kae1/Qri7           | 0.3954 (Non Antigen) |
| 244 | RNA polymerase sigma factor RpoD | 0.3979 (Non Antigen) |
| 245 | DNA primase                      | 0.3929 (Non Antigen) |

246 RAST Category: Fatty acids, lipids and isoprenoids

|     |                      |                      |
|-----|----------------------|----------------------|
| 246 | Cardiolipin synthase | 0.3305 (Non Antigen) |
|-----|----------------------|----------------------|

247 The collection of B-cell epitopes (linear antigens) predicted with Predicting Antigenic Peptides  
248 tool and BCEPred server is shown in Table 3.

249 **Table 3.B-Cell epitopes of *Ca. M. haemobos* and *M. wenyonii***  
250 **predicted by immunoinformatics**  
251

| <i>Ca. M. haemobos</i> INIFAP01 |                  | <i>M. wenyonii</i> INIFAP02                        |                  |
|---------------------------------|------------------|----------------------------------------------------|------------------|
| DNA gyrase subunit B            |                  | Ribosomal protein SSU S7p                          |                  |
| Position (aa)                   | Epitope sequence | Position (aa)                                      | Epitope sequence |
| 23-33                           | SSIRVLEGLEA      | 8-16                                               | LARRIVYNA        |
| 48-59                           | KGLHHLIWEVLD     | 35-43                                              | AIRNVAPSI        |
| 77-87                           | LKKGHVISVSD      | 54-63                                              | NYQVPVESSK       |
| 131-138                         | GVGSTCVN         | 67-76                                              | EALALRWLIK       |
| 140-150                         | LSSFLEVNVR       | Translation Elongation factor G                    |                  |
| 216-225                         | GKKFVFNVEI       | Position (aa)                                      | Epitope sequence |
| 251-261                         | SIHDVIFIHSE      | 26-33                                              | ERILYYTG         |
| 289-297                         | SSIVHSFCN        | 70-77                                              | WKGVLNL          |
| 313-321                         | DGLLSCIRE        | 122-132                                            | NKYKVPRIIFC      |
| 392-401                         | QRKVLQRVD        | 154-161                                            | NIKFSPIQ         |
| 442-451                         | FSELYVVEGD       | 212-220                                            | LLNEVLVYD        |
| 546-554                         | LLEHGYVYI        | 237-244                                            | EIKMCIRK         |
| 565-574                         | NKEVVYLFDD       | Translation Elongation factor Thermo unstable (Tu) |                  |
| DNA gyrase subunit A            |                  | Position (aa)                                      | Epitope sequence |
| 97-105                          | SIYDALVRM        | 167-178                                            | NTPVIRGSALKA     |
| 107-116                         | QDFSLRYPLI       | Ribosomal protein SSU S12p                         |                  |
| 139-148                         | RLSKLGKYFL       |                                                    |                  |

|                                                    |                  |                                 |                  |
|----------------------------------------------------|------------------|---------------------------------|------------------|
| SSU ribosomal protein S7p                          |                  | Position (aa)                   | Epitope sequence |
| Position (aa)                                      | Epitope sequence | 10-18                           | LRKFAKVRV        |
| 83-91                                              | SNYQVPVEA        | 20-29                           | NNHEVLAYIP       |
| 97-106                                             | ETLSLRWLIN       | 35-42                           | LQEHHVVM         |
| 116-125                                            | MVEALAHEII       | Ribosomal protein LSU L35p      |                  |
| Translation Elongation factor G                    |                  | Position (aa)                   | Epitope sequence |
| Position (aa)                                      | Epitope sequence | 15-24                           | LSKRVVVLGS       |
| 82-96                                              | GHVDFTVEVERSLRV  | 59-67                           | QYKITAHL         |
| 142-151                                            | YFKSVQSLRE       | Translation Initiation factor 3 |                  |
| 143-149                                            | YFKSVQSL         | Position (aa)                   | Epitope sequence |
| 153-162                                            | LKVNAVLIQL       | 8-18                            | RQLDLLLVNPK      |
| 170-178                                            | FIGIIDLIT        | 20-29                           | NPPVVKLLNF       |
| 211-219                                            | ELLDEVLTYS       | 84-94                           | EKVQLIIRTPY      |
| 235-244                                            | VEEIKHCIRI       | Ribosomal protein LSU L20p      |                  |
| 272-282                                            | VIDYLPSPIDL      | Position (aa)                   | Epitope sequence |
| 387-397                                            | VKGNQVVLESM      | 87-94                           | FVLNRKVL         |
| 420-428                                            | SMVLSRLSE        | 107-114                         | KIVDTSVK         |
| 451-459                                            | ELHLEILID        |                                 |                  |
| 518-525                                            | EFVDKIVG         |                                 |                  |
| Translation Elongation factor Thermo unstable (Tu) |                  |                                 |                  |
| Position (aa)                                      | Epitope sequence |                                 |                  |
| 97-107                                             | AQIDAAILVVS      |                                 |                  |
| SSU ribosomal protein S12p                         |                  |                                 |                  |
| Position (aa)                                      | Epitope sequence |                                 |                  |
| 20-27                                              | KSQALLKS         |                                 |                  |
| 31-39                                              | LDKKVTFQS        |                                 |                  |
| 42-49                                              | FKRGVCTR         |                                 |                  |
| 61-68                                              | ALRKYAKV         |                                 |                  |
| 72-81                                              | NNYEVLAYIP       |                                 |                  |
| 87-97                                              | LQEHHVVMVRG      |                                 |                  |
| DNA-directed RNA polymerase beta subunit           |                  |                                 |                  |
| Position (aa)                                      | Epitope sequence |                                 |                  |
| 61-71                                              | NGLFCESIFGP      |                                 |                  |
| 111-120                                            | HIELACPVAH       |                                 |                  |
| 168-177                                            | IFSELEIIDV       |                                 |                  |
| DNA-directed RNA polymerase                        |                  |                                 |                  |
| Position (aa)                                      | Epitope sequence |                                 |                  |
| 7-17                                               | RVNSFSPIVNR      |                                 |                  |
| 32-42                                              | DLKGVQLGAYT      |                                 |                  |

|           |             |  |  |
|-----------|-------------|--|--|
| 114-124   | SVENVFLGNLP |  |  |
| 140-147   | FIISQIVR    |  |  |
| 205-214   | LIQFPLTLL   |  |  |
| 320-327   | EIIKVTLE    |  |  |
| 468-477   | IEELLIYRTH  |  |  |
| 532-540   | LKLVDELLQ   |  |  |
| 587-597   | KPFQIVVKEFF |  |  |
| 677-685   | FFVTPYYRV   |  |  |
| 747-754   | CHQLVSVS    |  |  |
| 756-763   | SLIPFLEH    |  |  |
| 849-859   | CKNQYPLVRPK |  |  |
| 901-908   | IILSSRLI    |  |  |
| 966-975   | DILVGKVSPL  |  |  |
| 1096-1103 | QVLETHLG    |  |  |
| 1340-1347 | CLKINVQY    |  |  |

252

## 253 Discussion

254 The hemoplasmas have underwent phylogenetic reclassification after several studies based on  
255 molecular markers [33]. Their genome size variation, positional shuffling of genes and poorly  
256 conserved gene synteny are evidence of the high dynamic of their genomes [2]. In this work, we  
257 found that 12 genomes of hemoplasmas are classified in two groups, and have a different number  
258 of CDS and number of tRNAs, additionally, the G+C content vary from 30.46 to 39.27%  
259 between the members of the two groups. Thus, G+C content is not specific to each group.  
260 Specifically, in bovine hemoplasmas we found differences in genomic features between species.  
261 The genome of '*Ca. M. haemobos*' INIFAP01 is significantly longer in length than two genomes  
262 of *M. wenyonii* species, but '*Ca. M. haemobos*' INIFAP01 has a lower G+C content. Also, the  
263 number of tRNA genes and distribution of rRNA genes are specific to each species. The  
264 phylogenetic tree shows that '*Ca. M. haemobos*' INIFAP01 is phylogenetically distant through  
265 evolution with *M. wenyonii* INIFAP02 and *M. wenyonii* Massachusetts. Also, the INIFAP02 and  
266 Massachusetts strains are closely related through the evolution of group 2.

267 The number of genes in the core, soft, shell and cloud genomes revealed in the pan-genomic  
268 analysis suggest that there is considerable loss/gain of genes through evolution of the 12  
269 hemoplasmas genomes. Also, the genomes of group 1 (four genomes of three species) are more  
270 conserved than group 2 (eight genomes of six species); however, to confirm the previous result it  
271 is necessary to use a greater number of genomes of different species of group 1.

272 In regard to pan-genomic analysis of bovine hemoplasmas, due to the low number of gene  
273 clusters in the core genome it confirms that '*Ca. M. haemobos*' INIFAP01 is a divergent species  
274 from *M. wenyonii* INIFAP02 and *M. wenyonii* Massachusetts. In comparative genomics of  
275 bovine hemoplasmas, the low percentages of alignment coverage and identity between *Ca. M.*  
276 *haemobos*, *M. wenyonii* INIFAP02 and *M. wenyonii* Massachusetts in the ANI values suggest  
277 that *Ca. M. haemobos* INIFAP01 genome has a different structure than genomes of *M. wenyonii*  
278 INIFAP02 and *M. wenyonii* Massachusetts.

279 Surprisingly, the alignment coverage and identity percentages among both genomes of *M.*  
280 *wenyonii* (strains INIFAP02 and Massachusetts) suggest that these strains may not belong to the  
281 same species because the ANI values were <95%, the species ANI cutoff value [34–36].

282 A visual evaluation of circular map suggests that genomes of three bovine hemoplasmas are not  
283 conserved between them, in fact, this data confirms that '*Ca. M. haemobos*' INIFAP01 genome  
284 has a highly different structure than genomes of *M. wenyonii* INIFAP02 and *M. wenyonii*  
285 Massachusetts.

286 Since bovine hemoplasmas show significant differences at genomic level and they impact in  
287 cattle health causing economic losses, we decided to perform an immune-informatic analysis to  
288 identify B-cell epitopes that could be used in the design of potential vaccines to prevent bovine  
289 hemoplasmosis. The development of vaccines based on this strategy has been successfully used



290 to prevent some diseases in human and animals, including the cytoplasmic protein subolesin used  
291 to prevent infestations of tick *Rhipicephalus microplus* [37–40]. The immune-informatics  
292 analysis predicts several B-cell epitopes (Table 3), which could be used in the design of  
293 molecular detection methods and vaccines. Peptides that contains epitopes have been applied  
294 successfully for pathogen detection by serological methods [41,42], immunolocalization of  
295 pathogen proteins [43] and vaccines against animal diseases [44–46]. The epitope collection  
296 generated in this work will help to design molecular tools that contribute to prevent or diagnose  
297 bovine hemoplasmosis.

## 298 **Conclusions**

299 In this work, we described the main genomic characteristics and the evolutionary relationships  
300 between three bovine hemoplasmas. This is the first study to report the genomic characteristics  
301 of bovine hemoplasma species. Also, the data presented here about antigenic peptides of *M.*  
302 *wenyonii* INIFAP02 and *Ca. M. haemobos* INIFAP01 identified by immune-informatics have  
303 potential uses to detect and/or prevent hemoplasmosis.

## 304 **Acknowledgements**

305 To Maria Gabriela Guerrero Ruiz (Bioinformatics Analysis Unit, CCG, UNAM) for kindly  
306 collaborating with the comparative genomics analysis when using the CIRCOS program. This  
307 work was partially granted by Consejo Nacional de Ciencia y Tecnología (CONACyT) Project  
308 PN-CONACyT 248855 and CONACyT scholarship 293552.

## 309 **References**

310 Davidson BL, Allen ED, Kozarsky KF, Wilson JM, and Roessler BJ (1993). A model system  
311 for *in vivo* gene transfer into the central nervous system using an adenoviral vector. *Nat Genet* 3,  
312 219–223.

## 313 **References**

- 314 1. Messick JB. Hemotrophic mycoplasmas (hemoplasmas): a review and new insights into  
315 pathogenic potential. *Vet Clin Pathol* [Internet]. 2004 Mar [cited 2017 Mar 2];33(1):2–13.  
316 Available from: <http://doi.wiley.com/10.1111/j.1939-165X.2004.tb00342.x>
- 317 2. Guimaraes AMS, Santos AP, do Nascimento NC, Timenetsky J, Messick JB. Comparative  
318 genomics and phylogenomics of hemotrophic mycoplasmas. Balish MF, editor. *PLoS One*  
319 [Internet]. 2014 Mar 18;9(3):e91445. Available from:  
320 <http://www.ncbi.nlm.nih.gov/pmc/articles/PMC3958358/>
- 321 3. Rikihisa Y, Kawahara M, Wen B, Kociba G, Fuerst P, Kawamori F, et al. Western  
322 immunoblot analysis of *Haemobartonella muris* and comparison of 16S rRNA gene  
323 sequences of *H. muris*, *H. felis*, and *Eperythrozoon suis*. *J Clin Microbiol*. 1997  
324 Apr;35(4):823–9.
- 325 4. Neimark H, Johansson KE, Rikihisa Y, Tully JG. Proposal to transfer some members of  
326 the genera *Haemobartonella* and *Eperythrozoon* to the genus *Mycoplasma* with  
327 descriptions of ‘*Candidatus Mycoplasma haemofelis*’, ‘*Candidatus*  
328 *Mycoplasma haemomuris*’, ‘*Candidatus Mycoplasma haemosui*. *Int J Syst*  
329 *Evol Microbiol* [Internet]. 2001;51(3):891–9. Available from:  
330 <http://ijs.microbiologyresearch.org/content/journal/ijsem/10.1099/00207713-51-3-891>
- 331 5. dos Santos AP, Guimaraes AMS, do Nascimento NC, SanMiguel PJ, Messick JB.  
332 Complete genome sequence of *Mycoplasma wenyonii* strain Massachusetts. *J Bacteriol*.

- 333 2012 Oct;194(19):5458–9.
- 334 6. Martínez-Ocampo F, Rodríguez-Camarillo SD, Amaro-Estrada I, Quiroz-Castañeda RE.  
335 Draft genome sequence of “*Candidatus Mycoplasma haemobos*,” a hemotropic  
336 mycoplasma identified in cattle in Mexico. *Genome Announc* [Internet]. 2016 Aug  
337 25;4(4):1–2. Available from: <http://genomea.asm.org/content/4/4/e00656-16.abstract>
- 338 7. Quiroz-Castañeda RE, Martínez-Ocampo F, Dantán-González E. Draft Genome Sequence  
339 of *Mycoplasma wenyonii*, a Second Hemotropic *Mycoplasma* Species Identified in  
340 Mexican Bovine Cattle. *Microbiol Resour Announc*. 2018;7(9):1–2.
- 341 8. Hoelzle K, Hofmann-Lehmann R, Hoelzle LE. ‘*Candidatus Mycoplasma haemobos*’, a  
342 new bovine haemotropic *Mycoplasma* species? *Vet Microbiol*. 2010;144(3–4):525–6.
- 343 9. Tagawa M, Matsumoto K, Inokuma H. Molecular detection of *Mycoplasma wenyonii* and  
344 ‘*Candidatus Mycoplasma haemobos*’ in cattle in Hokkaido, Japan. *Vet Microbiol*.  
345 2008;132(1–2):177–80.
- 346 10. Niethammer FM, Ade J, Hoelzle LE, Schade B. Hemotropic mycoplasma in Simmental  
347 cattle in Bavaria: Prevalence, blood parameters, and transplacental transmission of  
348 ‘*Candidatus Mycoplasma haemobos*’ and *Mycoplasma wenyonii*. *Acta Vet Scand*.  
349 2018;60(1):1–8.
- 350 11. Genova SG, Streeter RN, Velguth KE, Snider TA, Kocan KM, Simpson KM. Severe  
351 anemia associated with *Mycoplasma wenyonii* infection in a mature cow. *Can Vet J*  
352 [Internet]. 2011 Sep;52(9):1018–21. Available from:  
353 <http://www.ncbi.nlm.nih.gov/pmc/articles/PMC3157061/>
- 354 12. Ade J, Niethammer F, Schade B, Schilling T, Hoelzle K, Hoelzle LE. Quantitative  
355 analysis of *Mycoplasma wenyonii* and ‘*Candidatus Mycoplasma haemobos*’ infections in

- 356 cattle using novel gapN-based realtime PCR assays. *Vet Microbiol.* 2018;220(December  
357 2017):1–6.
- 358 13. Hoelzle K, Winkler M, Kramer MM, Wittenbrink MM, Dieckmann SM, Hoelzle LE.  
359 Detection of *Candidatus Mycoplasma haemobos* in cattle with anaemia. *Vet J* [Internet].  
360 2011 Mar;187(3):408–10. Available from:  
361 <http://www.sciencedirect.com/science/article/pii/S1090023310000328>
- 362 14. Tagawa M, Yamakawa K, Aoki T, Matsumoto K, Ishii M, Inokuma H. Effect of Chronic  
363 Hemoplasma Infection on Cattle Productivity. *J Vet Med Sci* [Internet]. 2013 Oct  
364 15;75(10):1271–5. Available from:  
365 <http://www.ncbi.nlm.nih.gov/pmc/articles/PMC3942926/>
- 366 15. McFadden A, Ha HJ, Donald JJ, Bueno IM, van Andel M, Thompson JC, et al.  
367 Investigation of bovine haemoplasmas and their association with anaemia in New Zealand  
368 cattle. *N Z Vet J.* 2016 Jan;64(1):65–8.
- 369 16. Fujihara Y, Sasaoka F, Suzuki J, Watanabe Y, Fujihara M, OOSHITA K, et al. Prevalence  
370 of Hemoplasma Infection among Cattle in the Western Part of Japan. *J Vet Med Sci.*  
371 2011;73(12):1653–5.
- 372 17. Giroto A, Zangirolamo AF, Bogado ALG, Souza ASLE, da Silva GCF, Garcia JL, et al.  
373 Molecular detection and occurrence of ‘*Candidatus Mycoplasma haemobos*’ in dairy cattle  
374 of Southern Brazil. *Rev Bras Parasitol Vet.* 2012;21(3):342–4.
- 375 18. Tagawa M, Ybanez AP, Matsumoto K, Yokoyama N, Inokuma H. Prevalence and Risk  
376 Factor Analysis of Bovine Hemoplasma Infection by Direct PCR in Eastern Hokkaido,  
377 Japan. *J Vet Med Sci.* 2012;74(9):1171–6.
- 378 19. Parvizpour S, Pourseif MM, Razmara J, Rafi MA, Omidi Y. Epitope-based vaccine

- 379 design: a comprehensive overview of bioinformatics approaches. *Drug Discov Today*  
380 [Internet]. 2020; Available from: <https://doi.org/10.1016/j.drudis.2020.03.006>
- 381 20. Ahmad TA, Eweida AE, Sheweita SA. B-cell epitope mapping for the design of vaccines  
382 and effective diagnostics. *Trials Vaccinol* [Internet]. 2016;5:71–83. Available from:  
383 <http://www.sciencedirect.com/science/article/pii/S1879437816300079>
- 384 21. Ranjbar MH, Ebrahimi MM, Shahsavandi MM, Farhadi S, Mirjalili T, Tebianian A, et al.  
385 Novel applications of immuno-bioinformatics in vaccine and bio-product developments at  
386 research institutes. *Arch Razi Inst*. 2019;74(3):219–33.
- 387 22. Gurevich A, Saveliev V, Vyahhi N, Tesler G. QUASt: quality assessment tool for  
388 genome assemblies. *Bioinformatics* [Internet]. 2013 Apr 15;29(8):1072–5. Available  
389 from: <http://www.ncbi.nlm.nih.gov/pmc/articles/PMC3624806/>
- 390 23. Aziz RK, Bartels D, Best AA, DeJongh M, Disz T, Edwards RA, et al. The RAST Server:  
391 rapid annotations using subsystems technology. *BMC Genomics*. 2008 Feb;9:75.
- 392 24. Laslett D, Canback B. ARAGORN, a program to detect tRNA genes and tmRNA genes in  
393 nucleotide sequences. *Nucleic Acids Res*. 2004 Jan;32(1):11–6.
- 394 25. Lagesen K, Hallin P, Rødland EA, Staerfeldt H-H, Rognes T, Ussery DW. RNAmmer:  
395 consistent and rapid annotation of ribosomal RNA genes. *Nucleic Acids Res*.  
396 2007;35(9):3100–8.
- 397 26. Altschul SF, Gish W, Miller W, Myers EW, Lipman DJ. Basic local alignment search  
398 tool. *J Mol Biol*. 1990 Oct;215(3):403–10.
- 399 27. Edgar RC. MUSCLE: multiple sequence alignment with high accuracy and high  
400 throughput. *Nucleic Acids Res*. 2004;32(5):1792–7.
- 401 28. Darriba D, Taboada GL, Doallo R, Posada D. jModelTest 2: more models, new heuristics

- 402 and high-performance computing Europe PMC Funders Group. *Nat Methods*.  
403 2012;9(8):772.
- 404 29. Guindon S, Dufayard J-F, Lefort V, Anisimova M, Hordijk W, Gascuel O. New  
405 algorithms and methods to estimate maximum-likelihood phylogenies: assessing the  
406 performance of PhyML 3.0. *Syst Biol*. 2010 May;59(3):307–21.
- 407 30. Contreras-Moreira B, Vinuesa P. GET\_HOMOLOGUES, a versatile software package for  
408 scalable and robust microbial pangenome analysis. *Appl Environ Microbiol*. 2013  
409 Dec;79(24):7696–701.
- 410 31. Martin Shumway CA and SLSSKAPALDMS, Kurtz S, Phillippy A, Delcher AL, Smoot  
411 M, Shumway M, et al. Versatile and open software for comparing large genomes. *Genome*  
412 *Biol*. 2004;5(2):12.
- 413 32. Connors J, Krzywinski M, Schein J, Gascoyne R, Horsman D, Jones SJ, et al. Circos : An  
414 information aesthetic for comparative genomics. *Genome Res*. 2009;19(604):1639–45.
- 415 33. Peters IR, Helps CR, McAuliffe L, Neimark H, Lappin MR, Gruffydd-Jones TJ, et al.  
416 RNase P RNA gene (*rnpB*) phylogeny of hemoplasmas and other mycoplasma species. *J*  
417 *Clin Microbiol* [Internet]. 2008 May 1;46(5):1873–7. Available from:  
418 <http://jcm.asm.org/content/46/5/1873.abstract>
- 419 34. Goris J, Konstantinidis KT, Klappenbach JA, Coenye T, Vandamme P, Tiedje JM. DNA-  
420 DNA hybridization values and their relationship to whole-genome sequence similarities.  
421 *Int J Syst Evol Microbiol*. 2007;57(1):81–91.
- 422 35. Richter M, Rosselló-Móra R. Shifting the genomic gold standard for the prokaryotic  
423 species definition. *Proc Natl Acad Sci U S A*. 2009;106(45):19126–31.
- 424 36. Figueras MJ, Beaz-Hidalgo R, Hossain MJ, Liles MR. Taxonomic affiliation of new

- 425 genomes should be verified using average nucleotide identity and multilocus phylogenetic  
426 analysis. *Genome Announc.* 2014;2(6):6–7.
- 427 37. Michel-Todó L, Reche PA, Bigey P, Pinazo MJ, Gascón J, Alonso-Padilla J. In silico  
428 Design of an Epitope-Based Vaccine Ensemble for Chagas Disease. *Front Immunol.*  
429 2019;10(November):1–16.
- 430 38. Hajissa K, Zakaria R, Suppian R, Mohamed Z. Epitope-based vaccine as a universal  
431 vaccination strategy against *Toxoplasma gondii* infection: A mini-review. *J Adv Vet*  
432 *Anim Res* [Internet]. 2019 Mar 24;6(2):174–82. Available from:  
433 <https://pubmed.ncbi.nlm.nih.gov/31453188>
- 434 39. Manzano-Román R, Díaz-Martín V, Oleaga A, Pérez-Sánchez R. Identification of  
435 protective linear B-cell epitopes on the subolesin/akirin orthologues of *Ornithodoros* spp.  
436 soft ticks. *Vaccine.* 2015 Feb;33(8):1046–55.
- 437 40. de la Fuente J, Moreno-Cid JA, Canales M, Villar M, de la Lastra JMP, Kocan KM, et al.  
438 Targeting arthropod subolesin/akirin for the development of a universal vaccine for  
439 control of vector infestations and pathogen transmission. *Vet Parasitol.* 2011  
440 Sep;181(1):17–22.
- 441 41. Liu X, Marrakchi M, Xu D, Dong H, Andreescu S. Biosensors based on modularly  
442 designed synthetic peptides for recognition, detection and live/dead differentiation of  
443 pathogenic bacteria. *Biosens Bioelectron* [Internet]. 2016;80:9–16. Available from:  
444 <http://www.sciencedirect.com/science/article/pii/S0956566316300410>
- 445 42. Quiroz-Castañeda R, Tapia-Uriza TR, Mujica-Valencia C, Rodríguez-Camarillo SD,  
446 Preciado-De la Torre JF, Amaro-Estrada I, et al. Synthetic peptides-based indirect ELISA  
447 for the diagnosis of bovine anaplasmosis. *Int J Appl Res Vet Med.* 2019;17(2):65–70.

- 448 43. Molina AIB, Bayúgar RC, Gutiérrez-Pabello JA, López ATT, De La Torre JFP, Camarillo  
449 SDR. Immunolocalization of VirB11 protein in the Anaplasma marginale outer membrane  
450 and its reaction with bovine immune sera. Rev Mex Ciencias Pecu. 2018;9(4):769–91.
- 451 44. Wang CY, Chang TY, Walfield AM, Ye J, Shen M, Chen SP, et al. Effective synthetic  
452 peptide vaccine for foot-and-mouth disease in swine. Vaccine [Internet].  
453 2002;20(19):2603–10. Available from:  
454 <http://www.sciencedirect.com/science/article/pii/S0264410X02001482>
- 455 45. Droppa-Almeida D, Franceschi E, Padilha FF. Immune-Informatic Analysis and Design of  
456 Peptide Vaccine From Multi-epitopes Against Corynebacterium pseudotuberculosis.  
457 Bioinform Biol Insights [Internet]. 2018;12:1177932218755337. Available from:  
458 <https://europepmc.org/articles/PMC5954444>
- 459 46. Bashir S, Abd-elrahman KA, Hassan MA, Almofti YA. Multi Epitope Based Peptide  
460 Vaccine against Mareks Disease Virus Serotype 1 Glycoprotein H and B. Am J Microbiol  
461 Res. 2018;6:124–39.

## 462 **Supporting information**

463 **S1\_Fig. Pan-genomic analysis of 12 hemoplasmas.**

464 **S2\_Fig. Core, soft core, shell and cloud genomes of hemoplasmas.**

465 **S1\_Table. 12 hemoplasma genomes reported in the GenBank database.**

466 **S2\_Table. BLAST-based average nucleotide identity (ANiB) values of alignment coverage  
467 of 12 hemoplasma genomes.**

468 **S3\_Table. BLAST-based average nucleotide identity (ANiB) values of identity of 12  
469 hemoplasma genomes.**

470



## A) Clade I

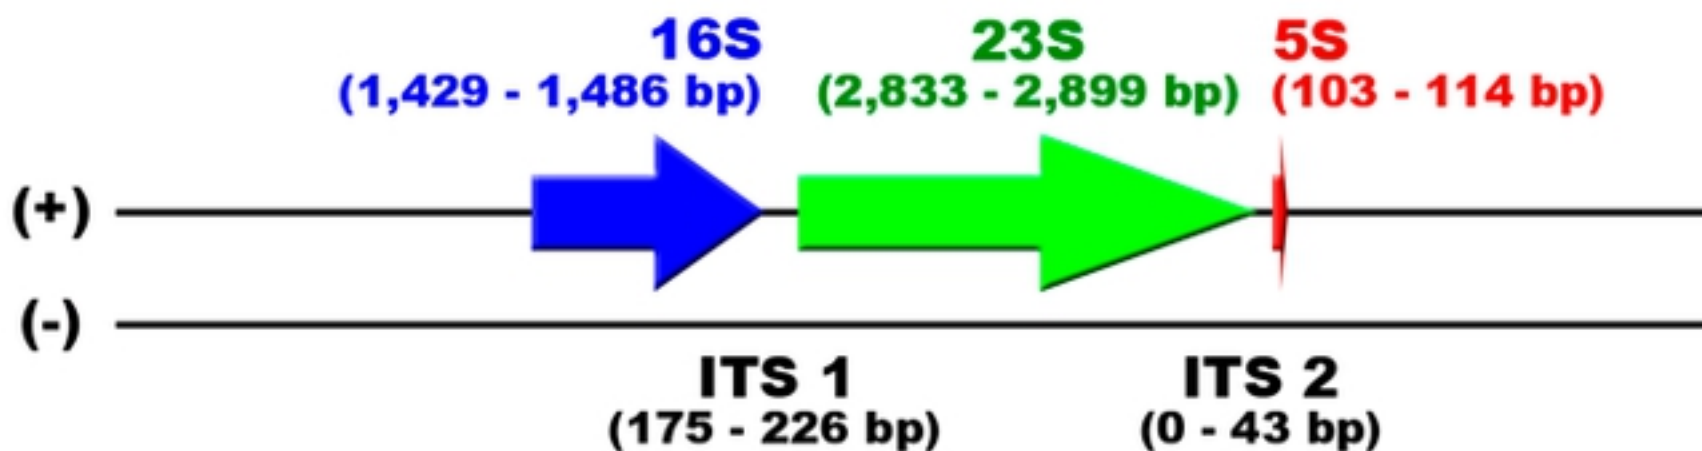

## B) Clade II

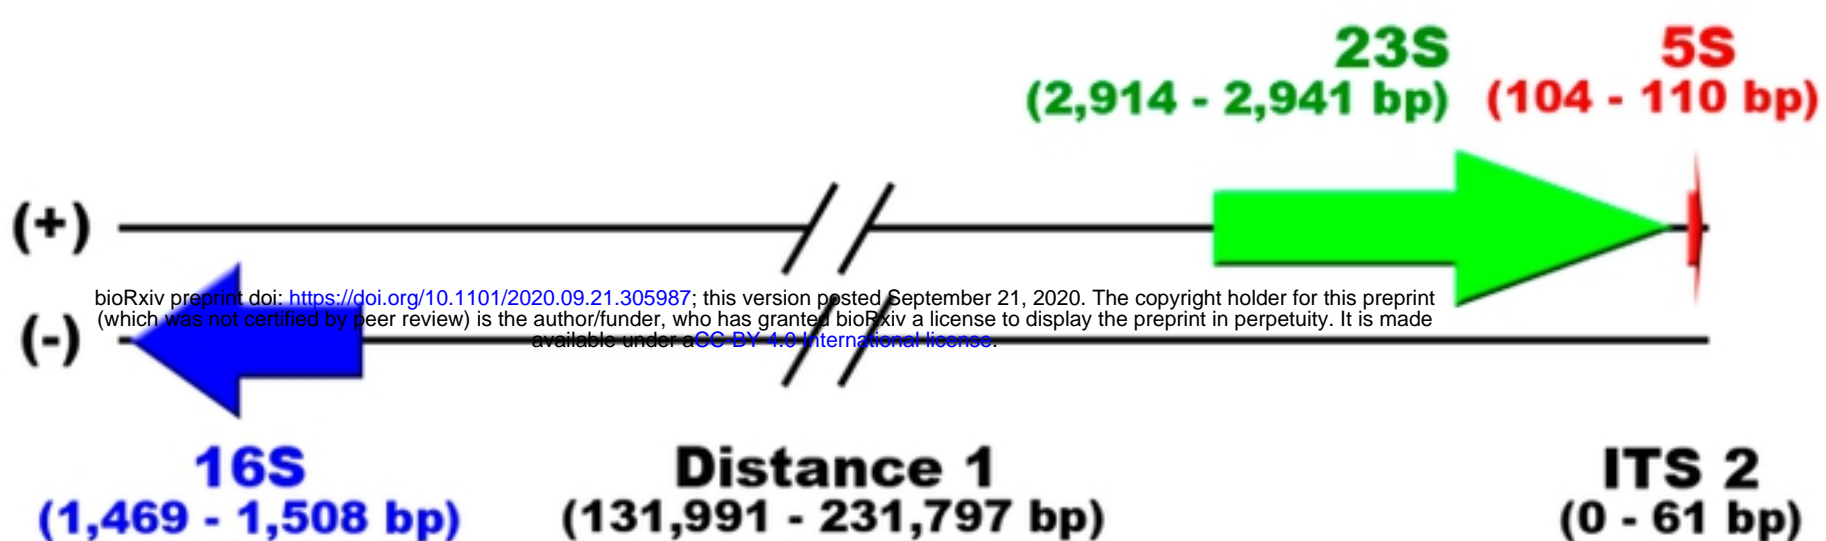

## C) Clade II (*M. parvum* Indiana)

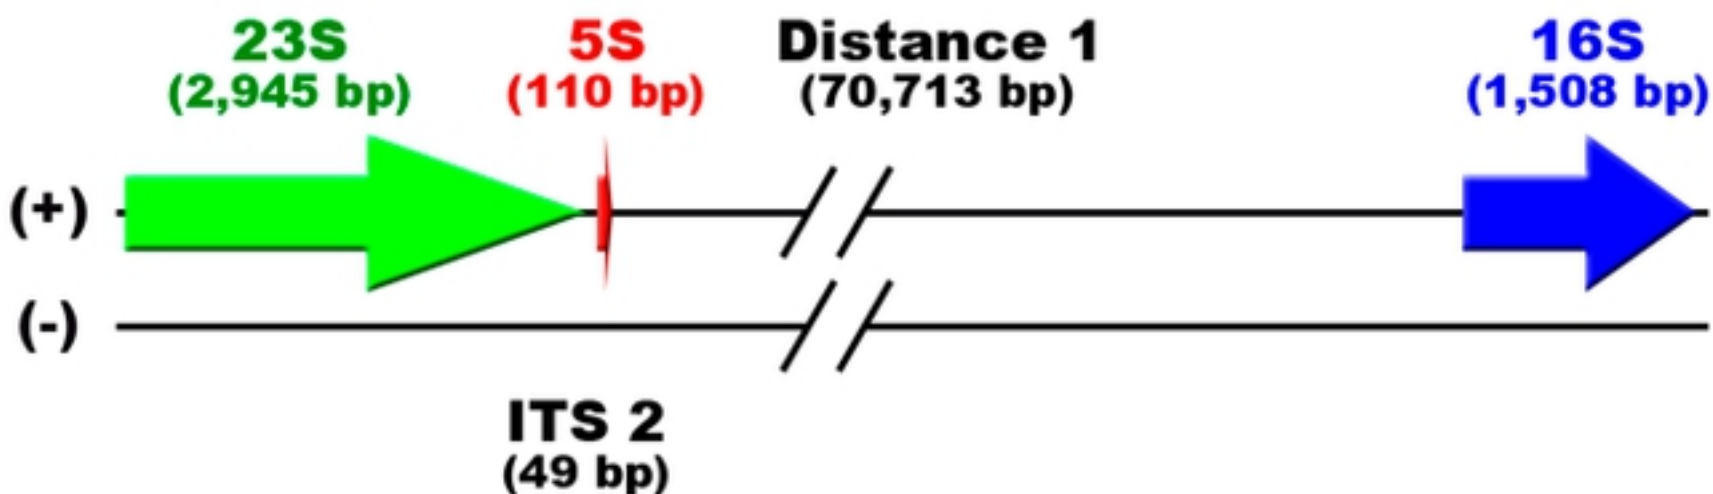

## D) Clade II (*M. ovis* Michigan)

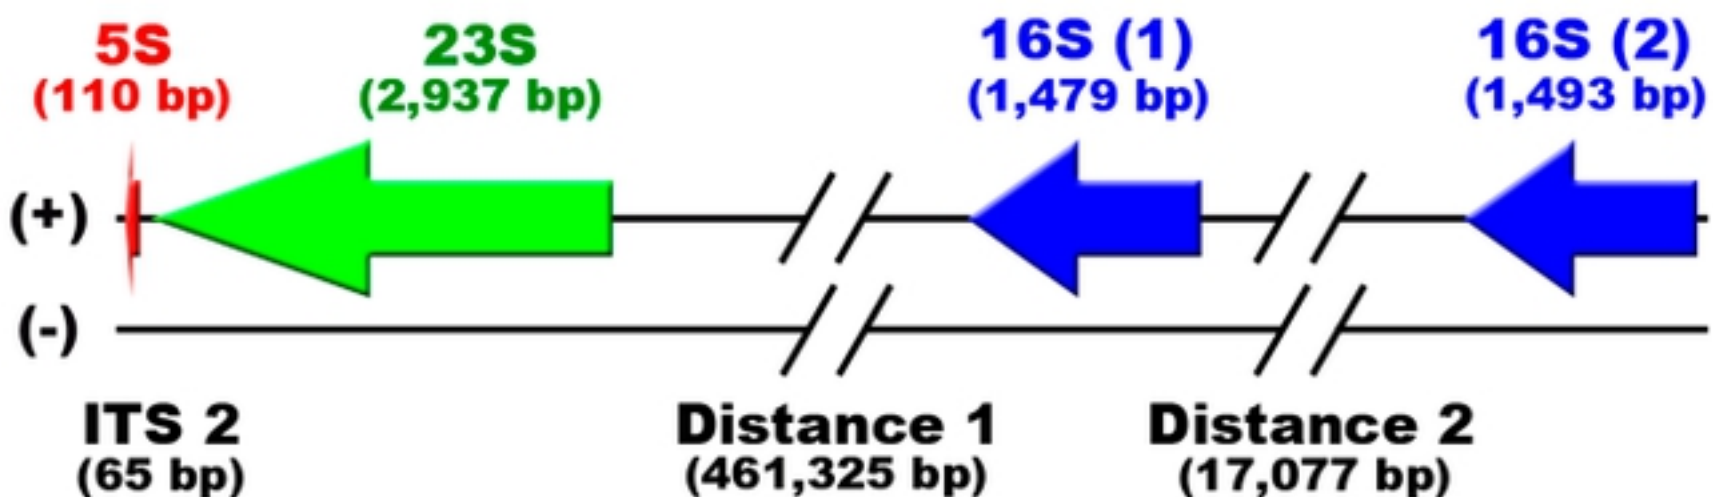

Fig1

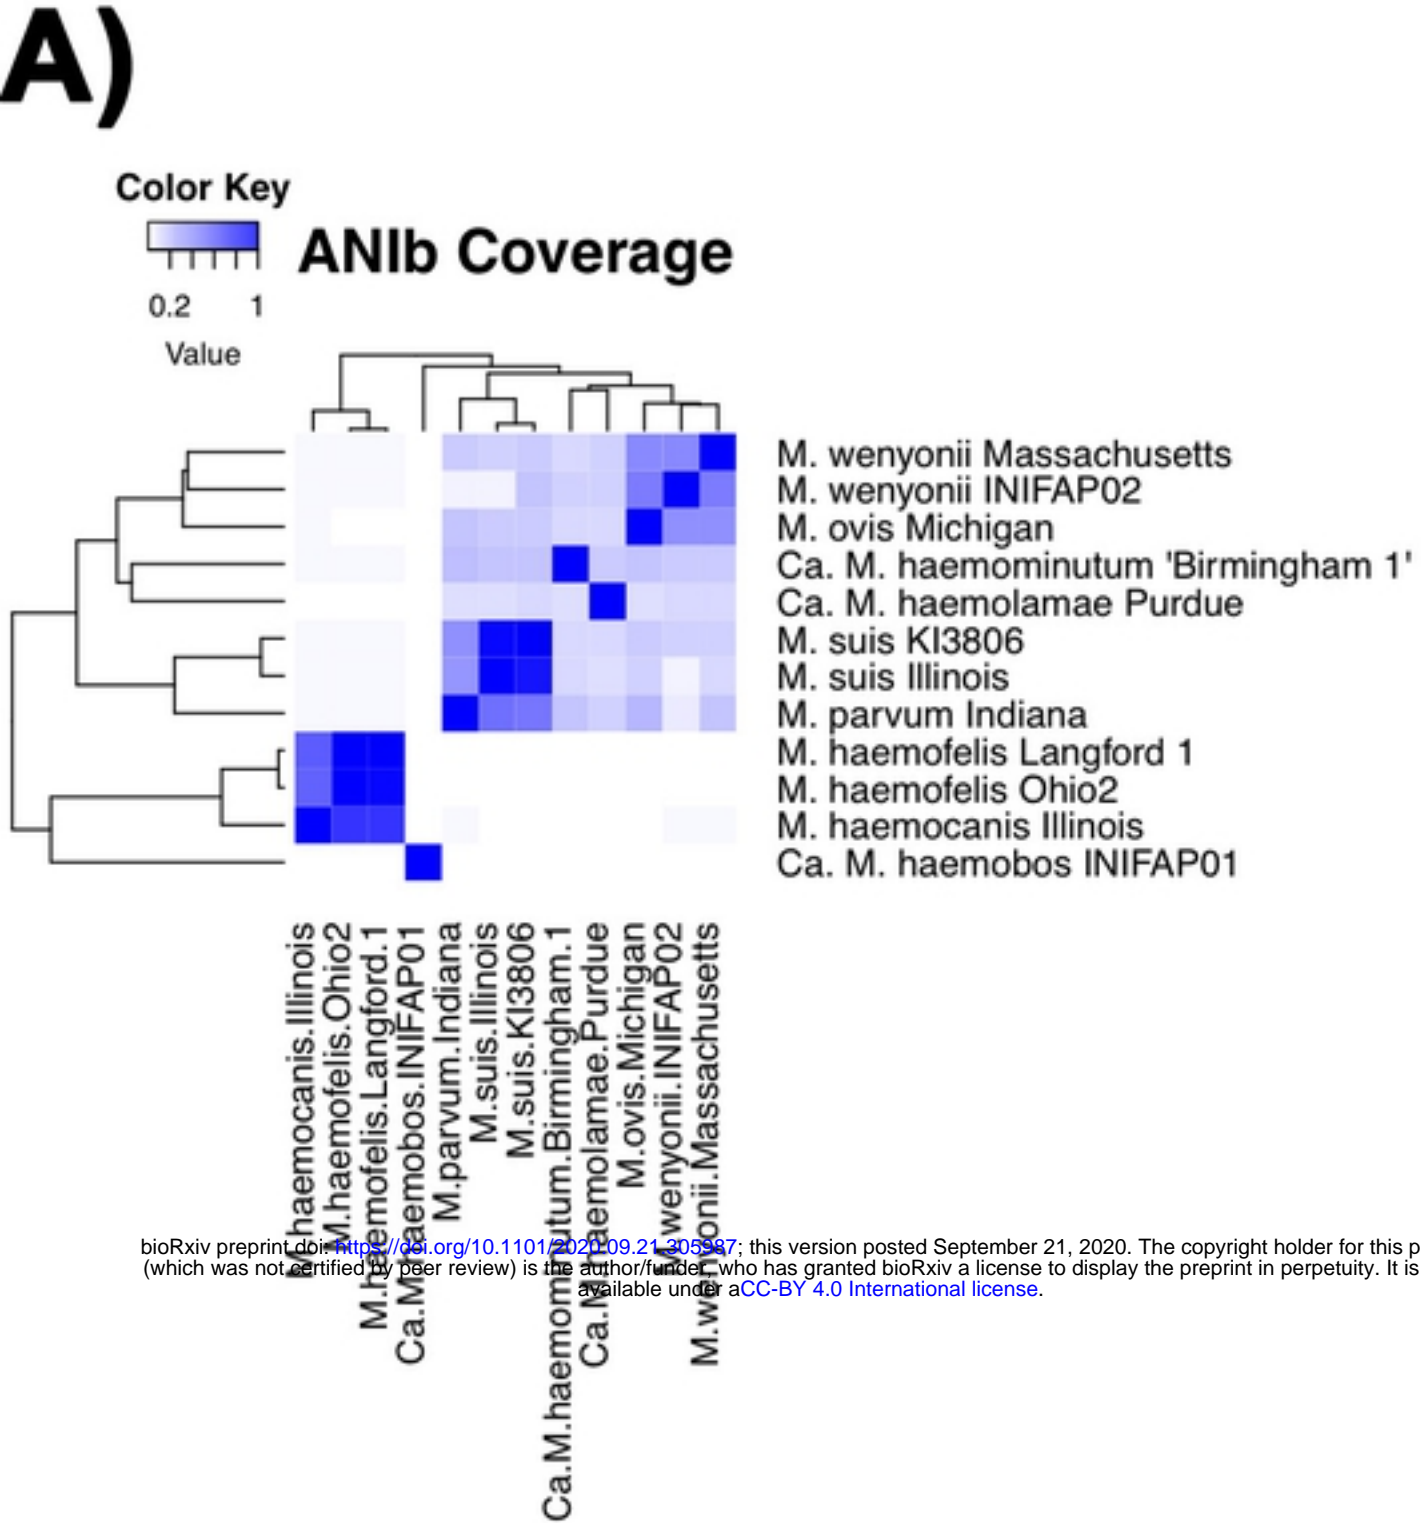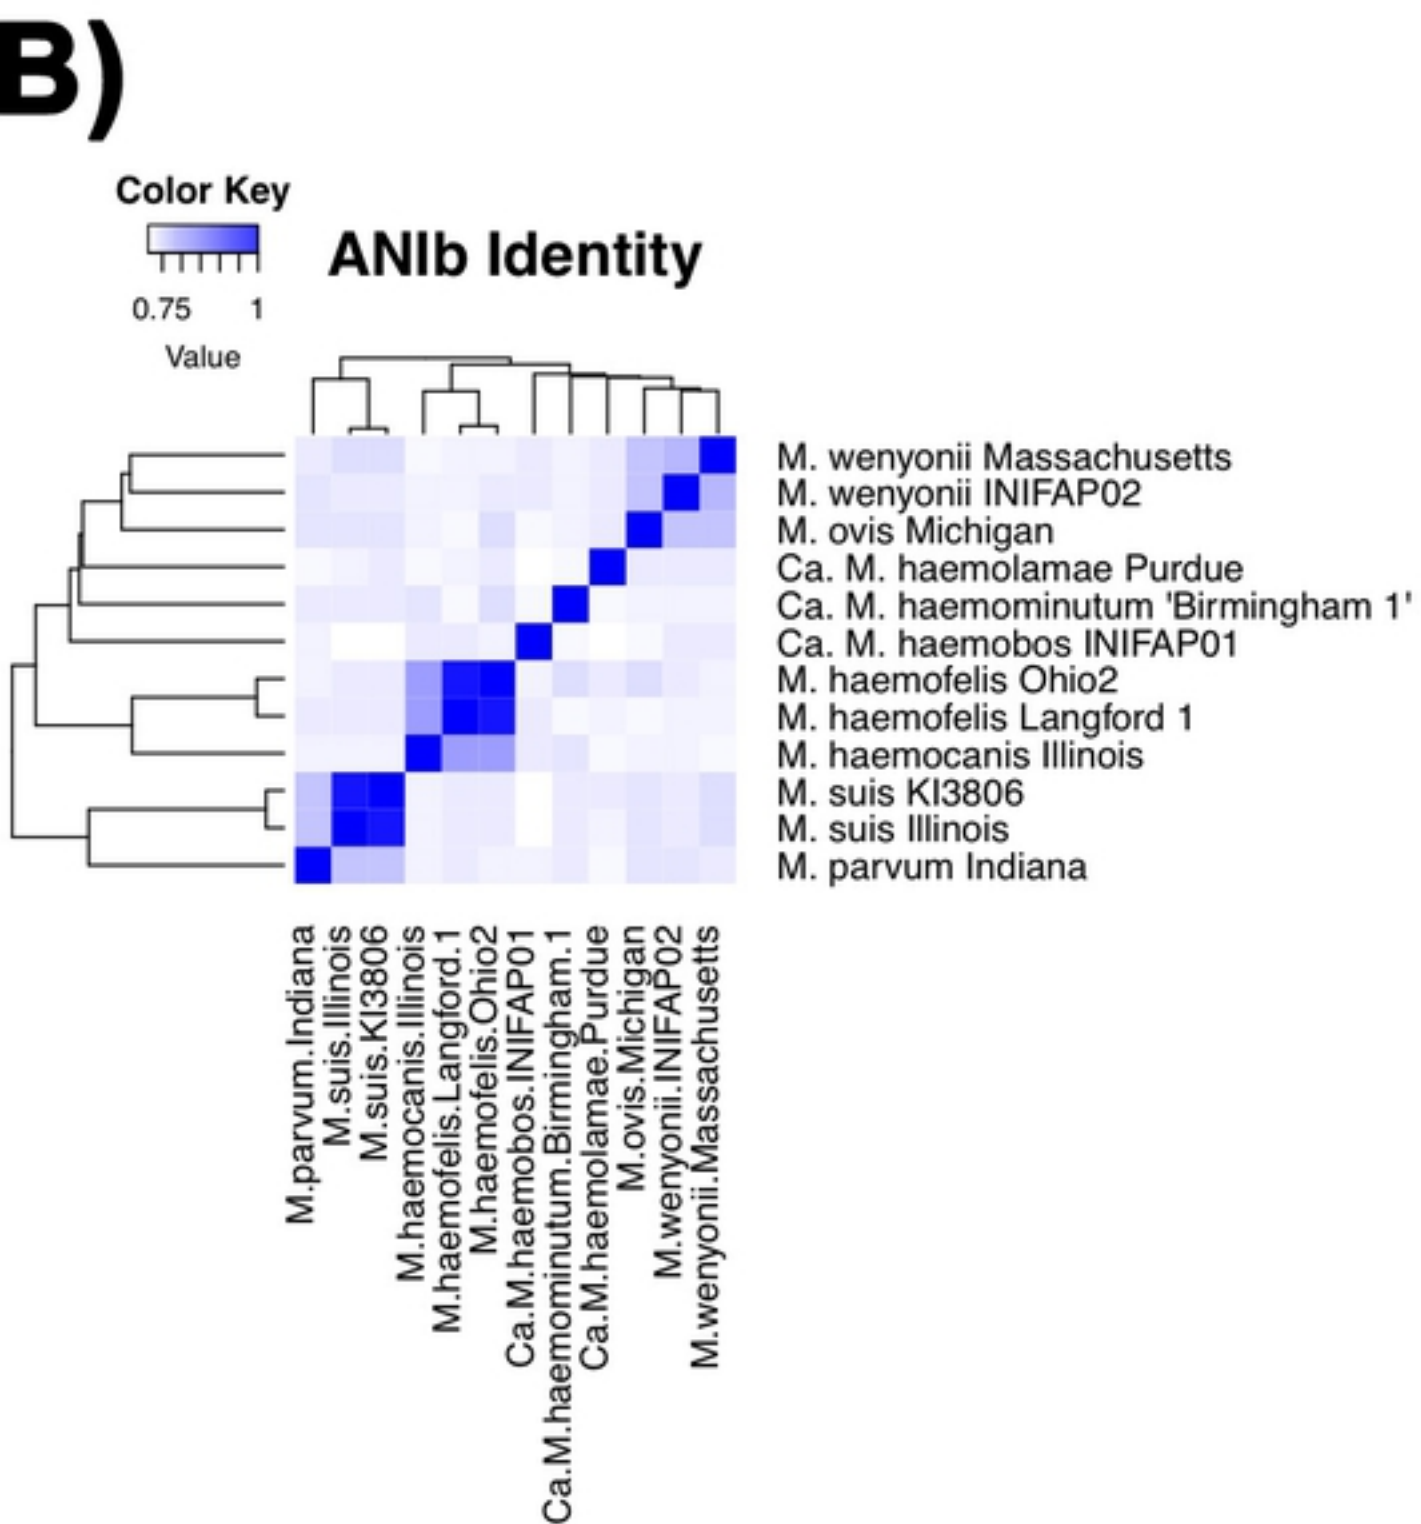

**Fig3**

bioRxiv preprint doi: <https://doi.org/10.1101/2020.09.21.305987>; this version posted September 21, 2020. The copyright holder for this preprint (which was not certified by peer review) is the author/funder, who has granted bioRxiv a license to display the preprint in perpetuity. It is made available under aCC-BY 4.0 International license.

***Mycoplasma wenyonii* Massachusetts**  
**650,228 bp**

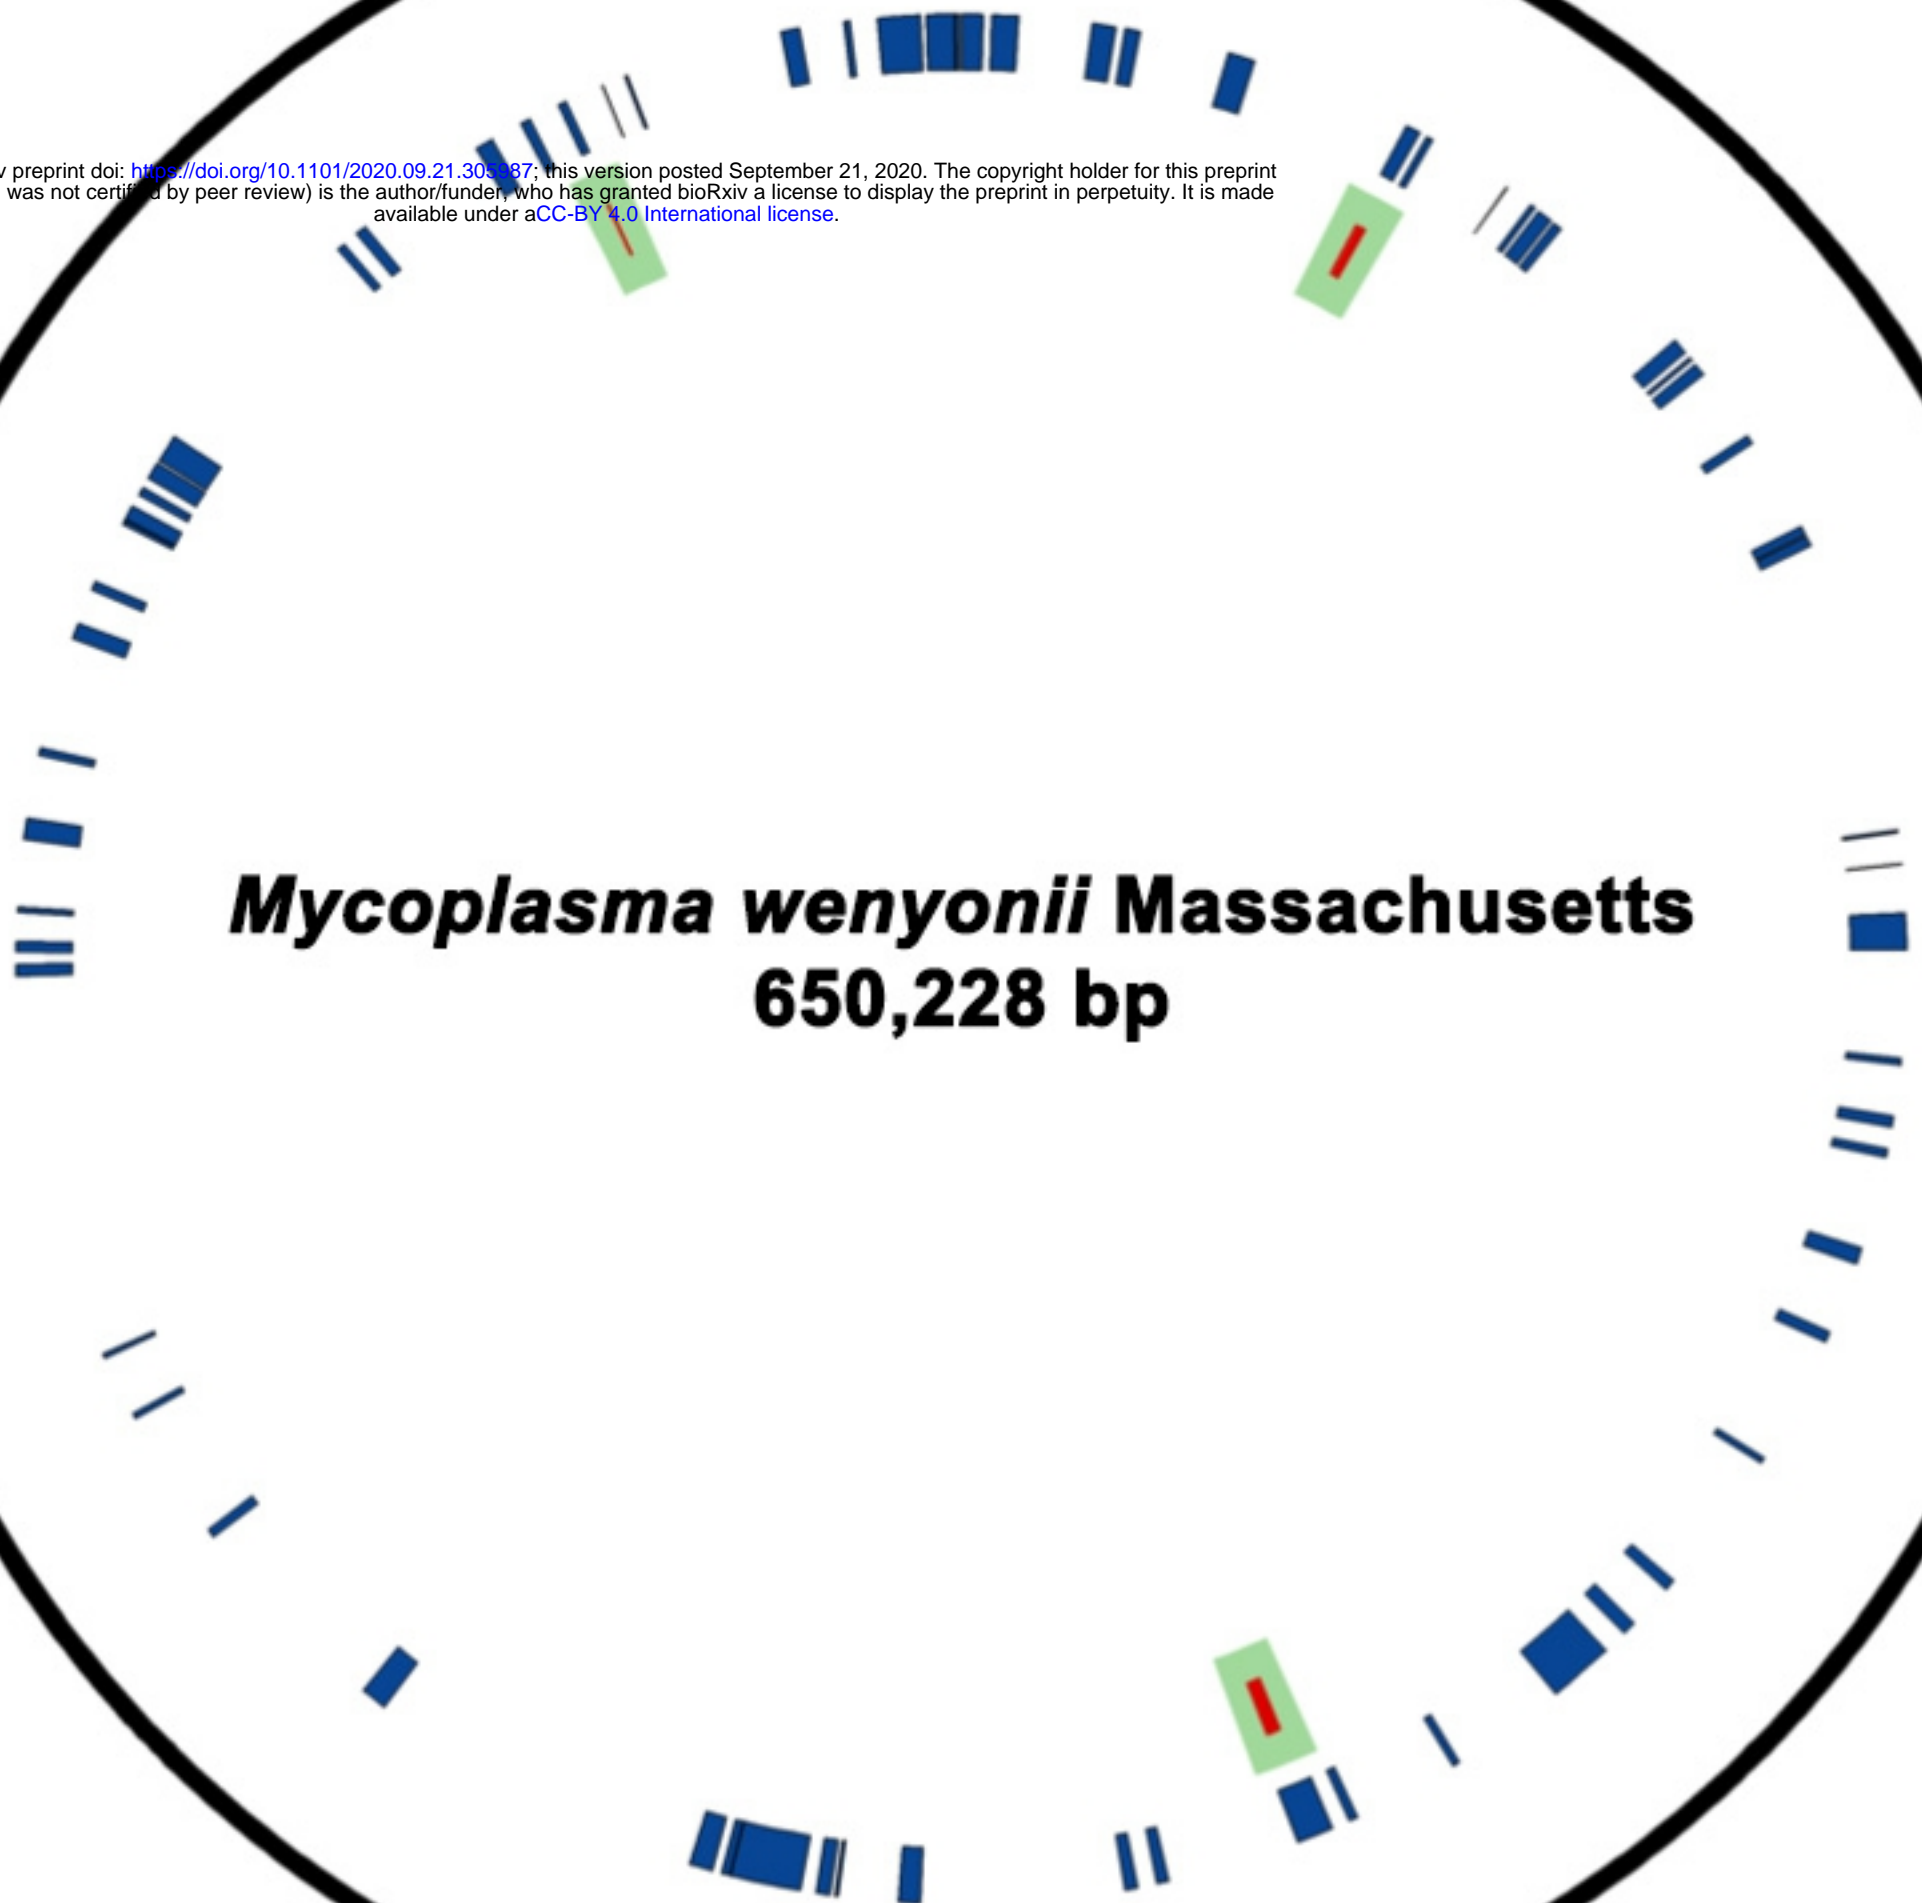

Fig4



bioRxiv preprint doi: <https://doi.org/10.1101/2020.09.21.305987>; this version posted September 21, 2020. The copyright holder for this preprint (which was not certified by peer review) is the author/funder, who has granted bioRxiv a license to display the preprint in perpetuity. It is made available under aCC-BY 4.0 International license.

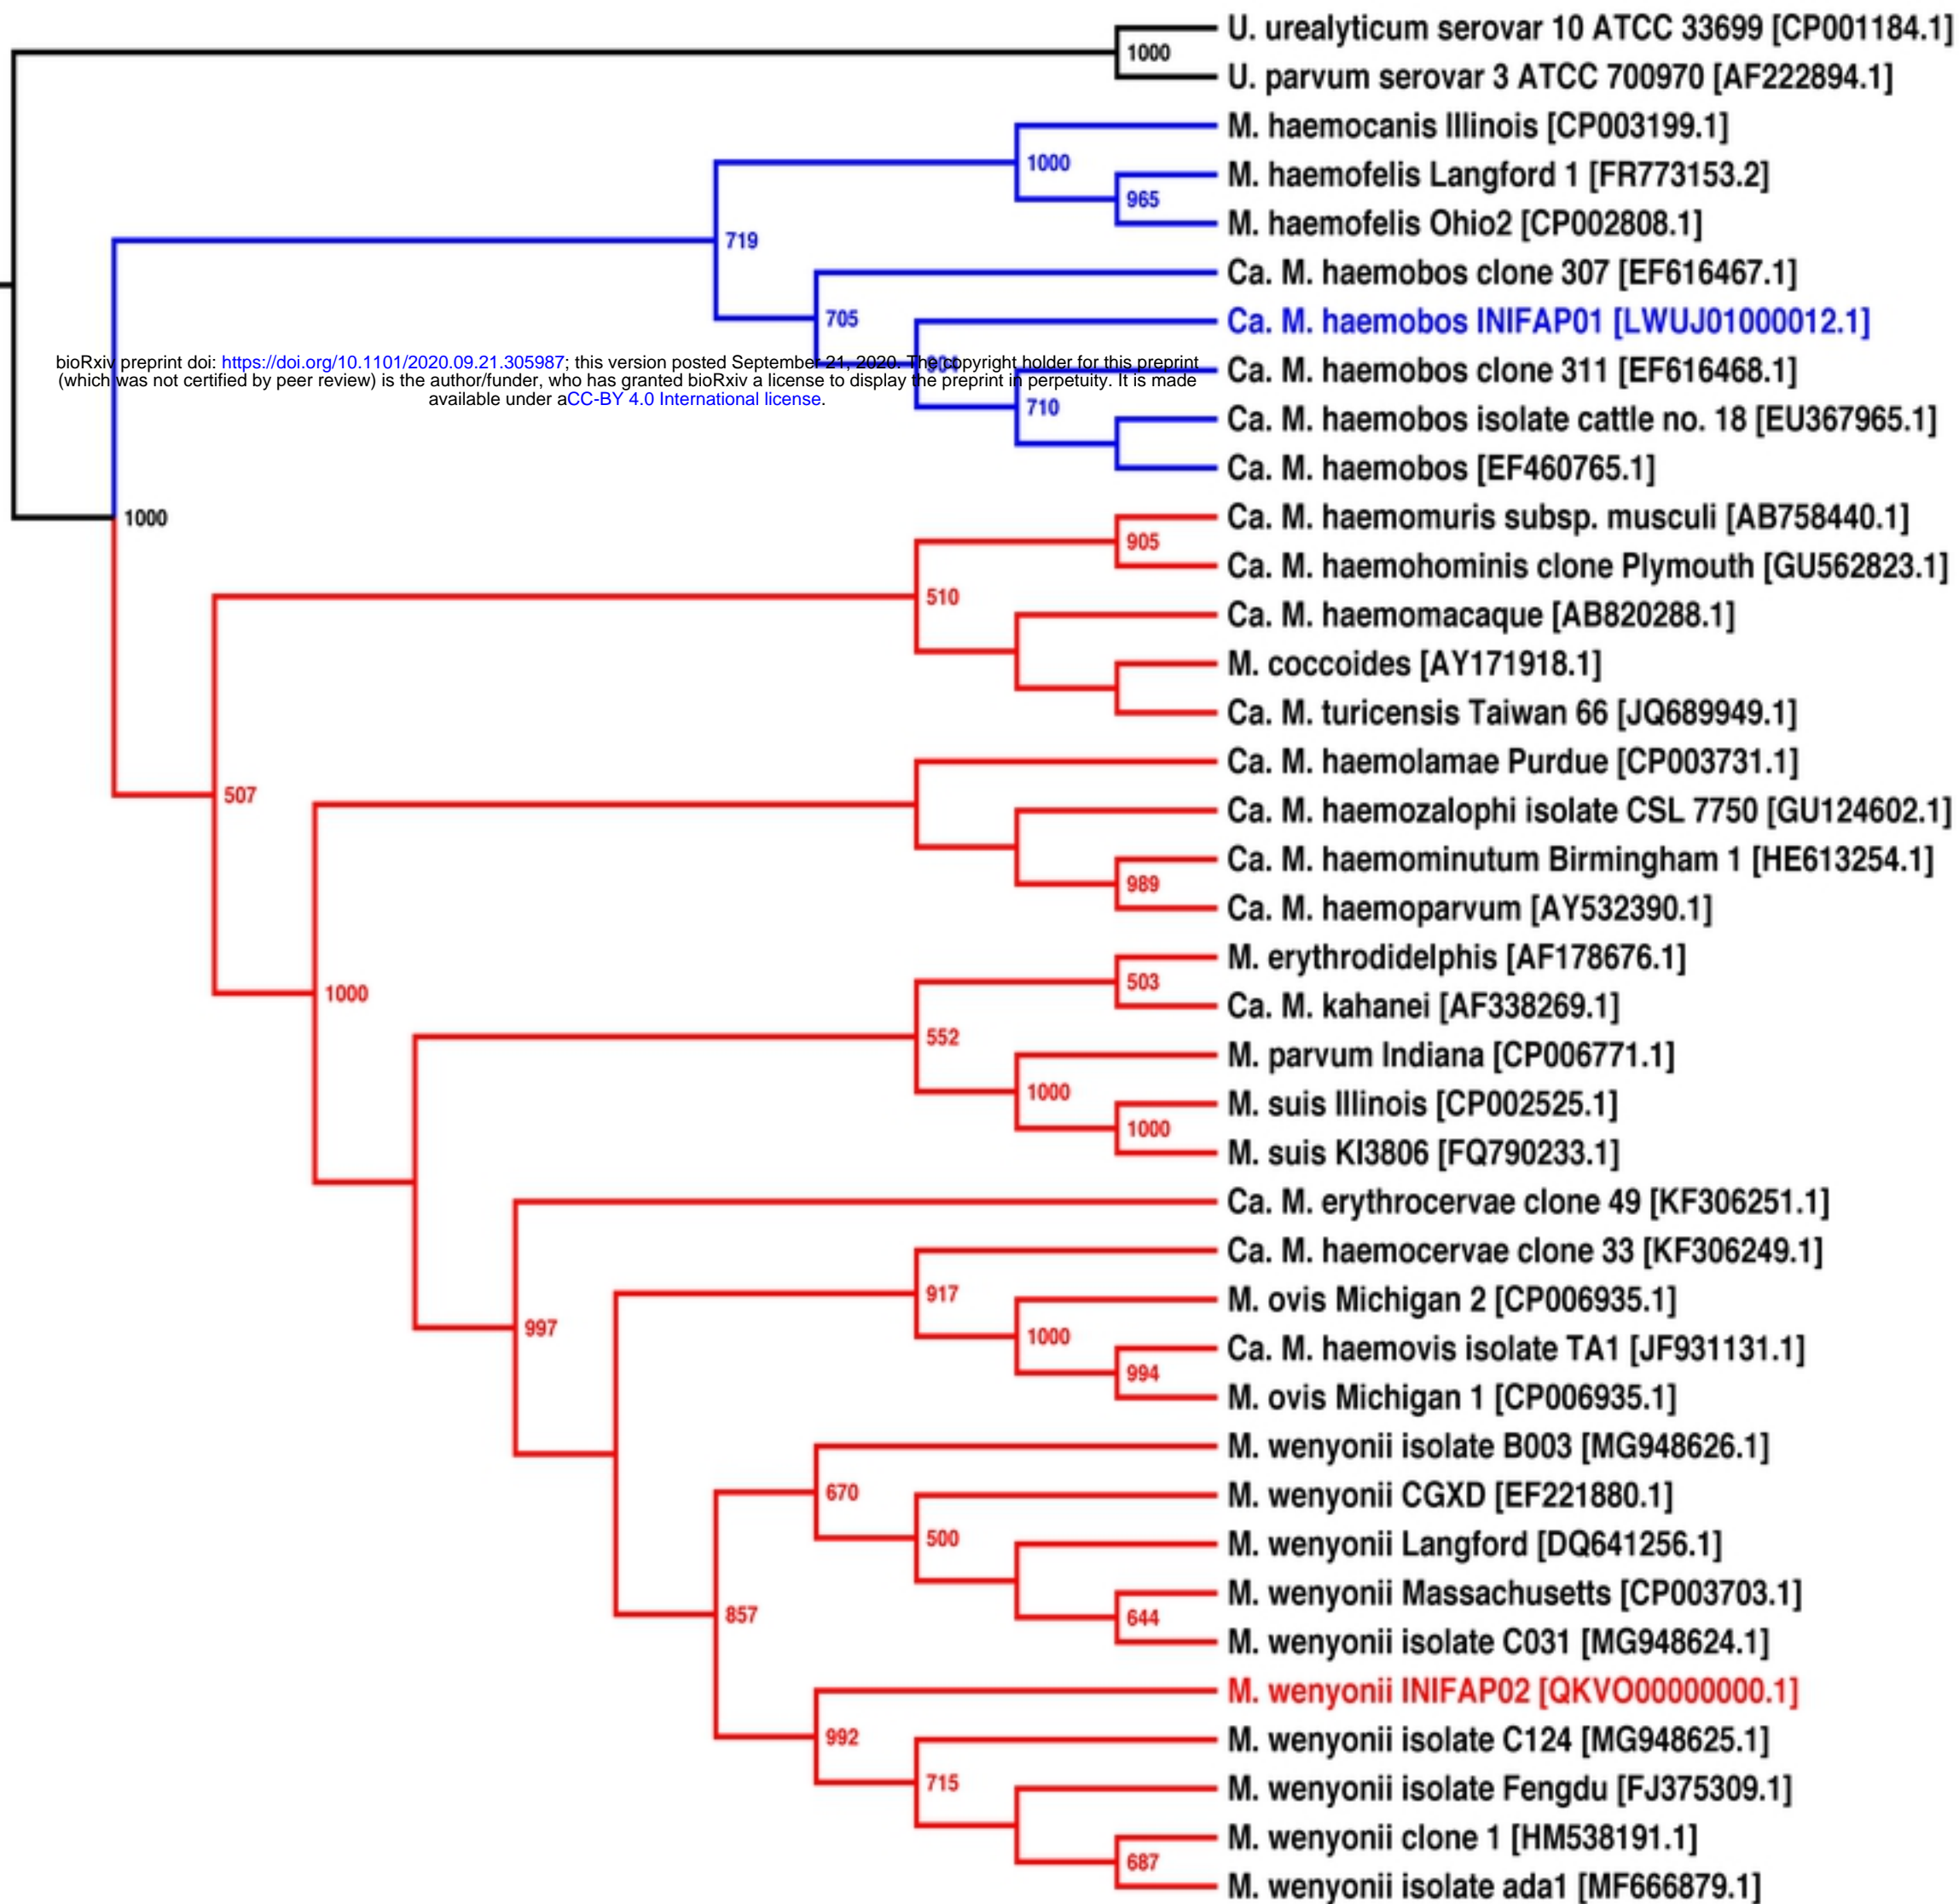

2.0

Fig2
